# Supplementary material for: Synthesis and self-assembly behaviour of poly(Nα-Boc-l-tryptophan)-block-poly(ethylene glycol)-block-poly(Nα-Boc-l-tryptophan)
Source: Royal Society of Chemistry journal article supplement (doi:10.1039/c6ra03718f), 2016-01-01
Supplement: c6ra03718f1.pdf [file c6ra03718f1.pdf]

## Supportive Information

# Synthesis and self-assembly behavior of poly( $N_{\alpha}$ - Boc-L-tryptophan)-*block*-poly(ethylene glycol)- *block*-poly( $N_{\alpha}$ -Boc-L-tryptophan)

Andreea S. Voda\*, Kevin Magniez, Nisa V. Salim, Cynthia Wong and Qipeng Guo\*

## 1. Synthesis

The first 18 samples were synthesised using 1,4-dioxane/ $\text{CHCl}_3$  (3 to 2 ratio) as solvent. DMF was used for sample 19. Feed ratios of starting materials along with concentration of materials in solution, temperature and time allowed for synthesis were all found to be contributing factors to the chain extension achieved. The solvent used for synthesis also seemed to carry an overbearing effect over chain extension with higher molecular weight hydrophobic blocks being achieved in DMF compared to 1,4-dioxane/ $\text{CHCl}_3$ , when using the same starting material ratio and concentration in solution, the same reaction temperature, whilst allowing less reaction time. The drawback of using DMF as a solvent was its high boiling point making it harder to remove *in vacuo*, with its complete removal only being achieved following subsequent dialysis into water.

The influence of concentrations in solution, reaction time allowed, temperature and solvent used are reported in Table 1S below.

**Table 1S.** Library of 19 copolymers displaying the effects of feed ratios, concentration, temperature and time on BocLTrp monomer attachment,  $M_n$  and yield of PBocLTrp-*b*-PEG-*b*-PBocLTrp copolymers.

| BAB Number | BAPEG : BocLTrp Feed | Conc (w/v %) (g/ml) | Temp (°C) | Time (hrs) | $M_n^{**}$ | BocLTrp attached | Yield % |
|------------|----------------------|---------------------|-----------|------------|------------|------------------|---------|
| 1*         | 2 : 1                | 5                   | 40        | 72         | 5,002      | 5                | 69      |
| 2          | 1 : 1                | 5                   | 40        | 72         | 4,672      | 4                | 53      |
| 3          | 1 : 1.3              | 5                   | 40        | 120        | 5,332      | 9                | 58      |
| 4          | 1 : 1                | 5                   | 40        | 72         | 6,654      | 10               | 44      |
| 5          | 1 : 2                | 3                   | 40        | 72         | 3,350      | 0                | 0       |
| 6          | 1 : 1.8              | 3                   | 50        | 72         | 3,350      | 0                | 0       |
| 7          | 1 : 1.8              | 5                   | 40        | 72         | 7,976      | 14               | 49      |
| 8*         | 1 : 1.8              | 5                   | 40        | 120        | 11,940     | 26               | 59      |
| 9          | 1 : 1.8              | 5                   | 50        | 72         | 6,654      | 10               | 55      |
| 10*        | 1 : 2                | 5                   | 40        | 72         | 13,923     | 32               | 66      |
| 11         | 1 : 2.5              | 3                   | 40        | 96         | 3,350      | 0                | 0       |
| 12         | 1 : 2.5              | 3                   | 50        | 96         | 5,993      | 8                | 38      |
| 13         | 1 : 2.5              | 5                   | 40        | 96         | 7,976      | 14               | 46      |
| 14         | 1 : 3                | 5                   | 40        | 72         | 4,011      | 4                | 24      |
| 15         | 1 : 3.5              | 3                   | 40        | 96         | 7,976      | 14               | 28      |
| 16         | 1 : 3.5              | 5                   | 40        | 72         | 3,350      | 0                | 0       |
| 17         | 1 : 5                | 5                   | 40        | 72         | 13,592     | 31               | 27      |
| 18         | 1 : 11               | 5                   | 40        | 72         | 11,610     | 25               | 78      |
| 19*        | 1 : 1.8              | 5                   | 40        | 96         | 16,566     | 40               | 80      |

\* copolymers selected for further self-assembly studies \*\* as calculated through  $^1\text{H}$  NMR integrations.

## 2. 2D-NMR

2D NMR spectra were measured on a Jeol Eclipse JNM-EX400 MHz spectrometer as. All spectra were collected at room temperature using the residual proton resonance of the CDCl<sub>3</sub> as the internal standard. Proton signals reported as chemical shift  $\sigma$  (ppm).

Heteronuclear Multiple-Bond Correlation (HMBC), a proton detected 2D experiment providing information about direct through bond proton carbon interactions, was used. The x frequency axis represents the <sup>1</sup>H spectrum of the molecule of interest whilst the y axis represents its <sup>13</sup>C spectrum.

Another proton detected experiment employed was the Heteronuclear Multiple-Bond Correlation (HMBC). This method will generally detect  $^2J_{CH}$  and  $^3J_{CH}$ , with  $^4J_{CH}$  sometimes observed. Not all long-range coupling will be observed, therefore HMBC experiments need to be supported by other 2D data for comprehensive structure elucidation. The x and y frequency axes are plotted in the same manner as for a HMQC experiment.

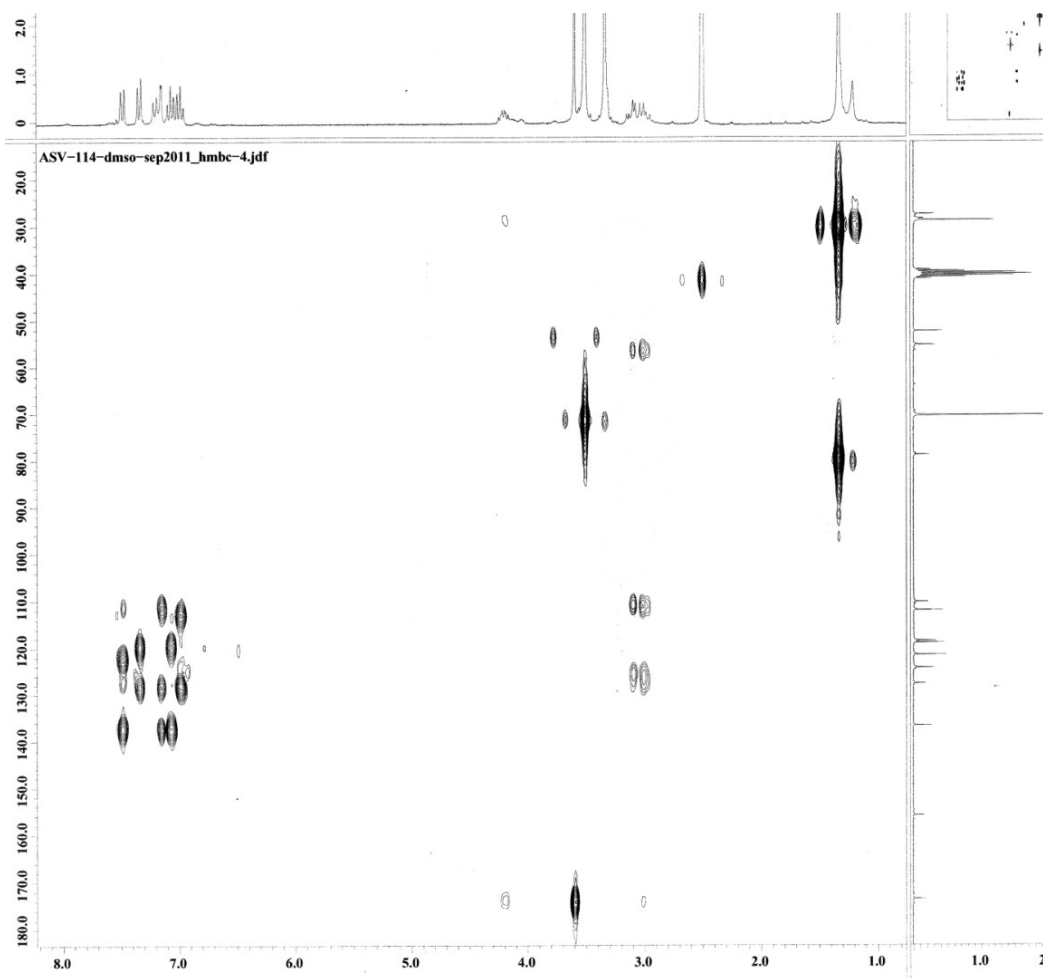

**Figure 1S.** HMBC spectrum of PBocLTrp-*b*-PEG-*b*-PBocLTrp copolymer in  $d_6$ -DMSO.

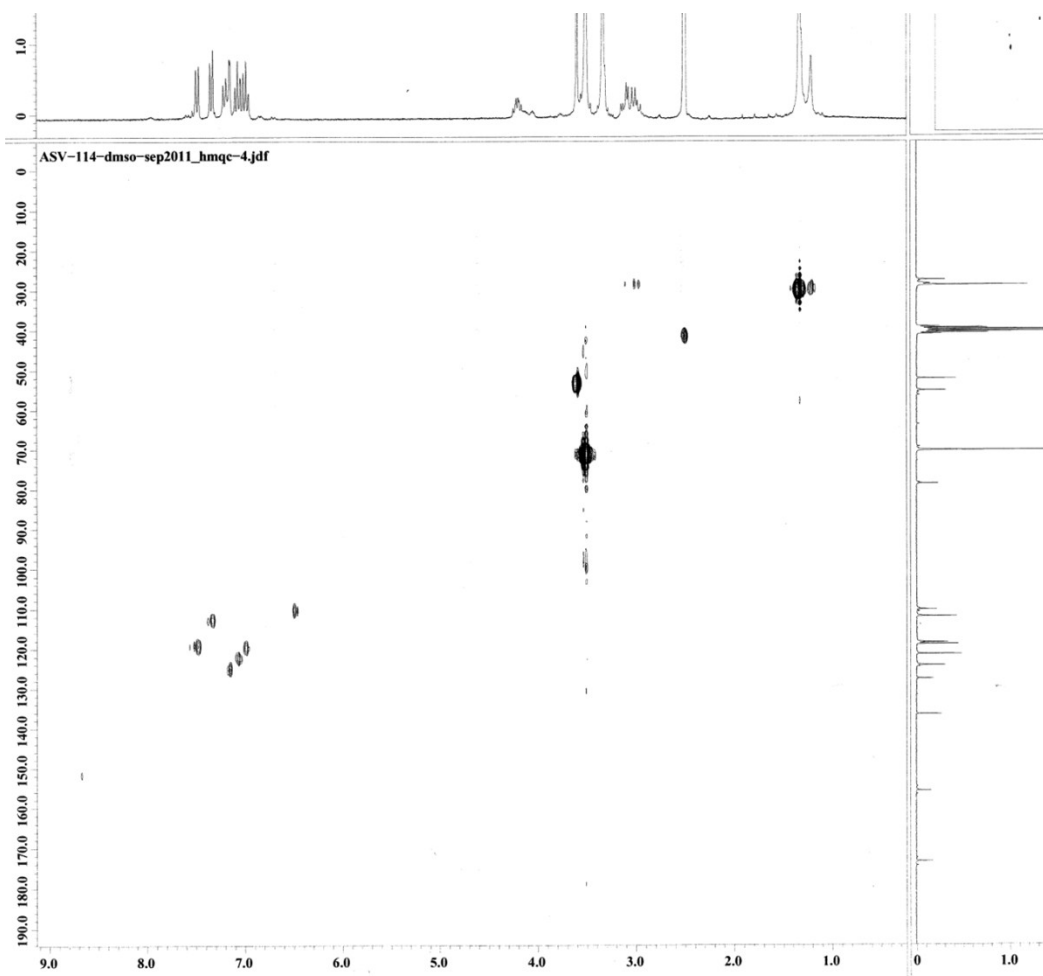

**Figure 2S.** HMQC spectrum of PBocLTrp-*b*-PEG-*b*-PBocLTrp copolymer in  $d_6$ -DMSO.

**Table 2S.** HMBC correlations for PBocLTrp-*b*-PEG-*b*-PBocLTrp in *d*<sub>6</sub>-DMSO.

| <sup>1</sup> H δ (ppm) | <sup>13</sup> C δ (ppm)            |
|------------------------|------------------------------------|
| 10.85                  | 110.3<br>127.62<br>136.67          |
| 7.53                   | 110.3<br>121.5<br>127.62<br>136.67 |
| 7.34                   | 118.96<br>127.62                   |
| 7.12-7.26              | 110.3<br>127.62<br>136.67          |
| 7.07                   | 118.55<br>136.67                   |
| 6.99                   | 112.01<br>127.62                   |
| 4.13                   | 27.39<br>173.51                    |
| 3.05                   | 127.62<br>173.51                   |

**Table 3S.** Complete structure assignment of PBocLTrp-*b*-PEG-*b*-PBocLTrp copolymers in  $d_6$ -DMSO.

| $^{13}\text{C}$ $\delta$<br>(ppm) | DEPT-135<br>elucidation | $^1\text{H}$ attached<br>(ppm)* | $^1\text{H}$<br>multiplicity | Molecule<br>assignment** |
|-----------------------------------|-------------------------|---------------------------------|------------------------------|--------------------------|
| 173.51                            | Quaternary              | -----                           | -----                        | t-Boc C=O                |
| 155.94                            | Quaternary              | -----                           | -----                        | C=O                      |
| 136.67                            | Quaternary              | -----                           | -----                        | C-NH                     |
| 127.62                            | Quaternary              | -----                           | -----                        | Indole quaternary        |
| 124.3                             | CH                      | 7.12-7.26                       | m                            | C2                       |
| 121.5                             | CH                      | 7.07                            | t                            | C5                       |
| 118.96                            | CH                      | 6.99                            | t                            | C6                       |
| 118.55                            | CH                      | 7.53                            | d                            | C4                       |
| 112.01                            | CH                      | 7.34                            | d                            | C7                       |
| 110.3                             | Quaternary              | -----                           | -----                        | C3                       |
| 78.81                             | Quaternary              | -----                           | -----                        | t-Boc                    |
| 70.36                             | CH <sub>2</sub>         | 3.51                            | s                            | PEG CH <sub>2</sub>      |
| 55.25                             | CH                      | 4.13                            | m                            | $\alpha$ -C              |
| 27.39                             | CH <sub>2</sub>         | 3.05                            | m                            | $\beta$ -C               |
| 28.70                             | CH <sub>3</sub>         | 1.33                            | s                            | t-Boc CH <sub>3</sub>    |

(\*As determined from HMQC experiments. \*\*As determined from HMBC, HMQC and DEPT-135).



### 3. GPC

#### BAB 5000

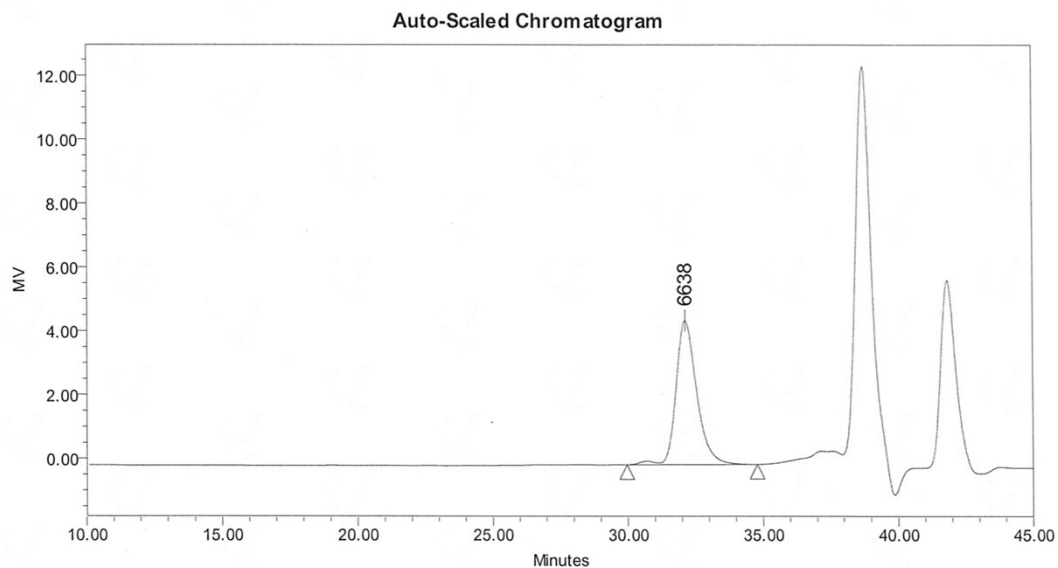

**GPC Results**

|   | Retention Time | Adjusted RT | Mn   | Mw   | MP   | Mz   | Mz+1 | Poly dispersity | Baseline Start | Baseline End |
|---|----------------|-------------|------|------|------|------|------|-----------------|----------------|--------------|
| 1 | 32.130         | 32.130      | 6287 | 6540 | 6638 | 6822 | 7175 | 1.040142        | 29.967         | 34.800       |

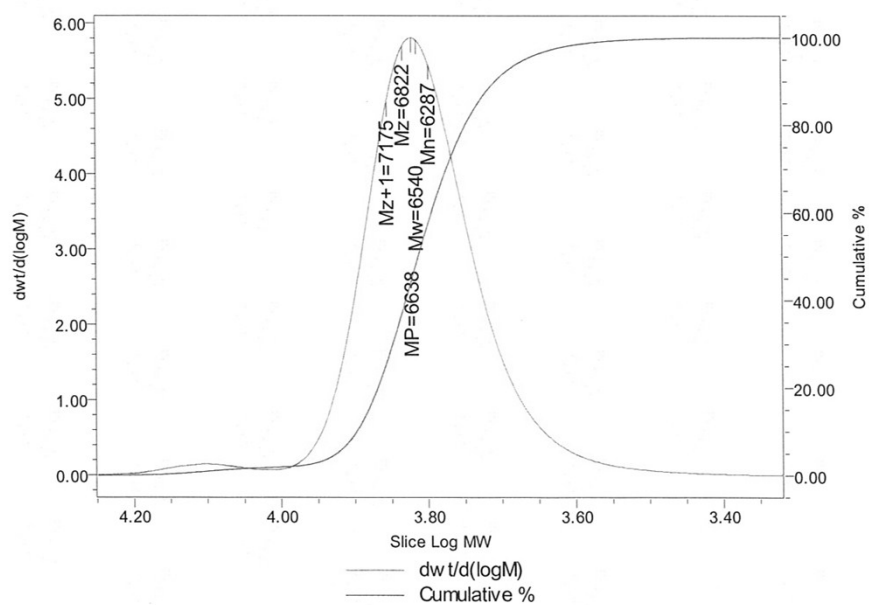

# BAB 12000

Auto-Scaled Chromatogram

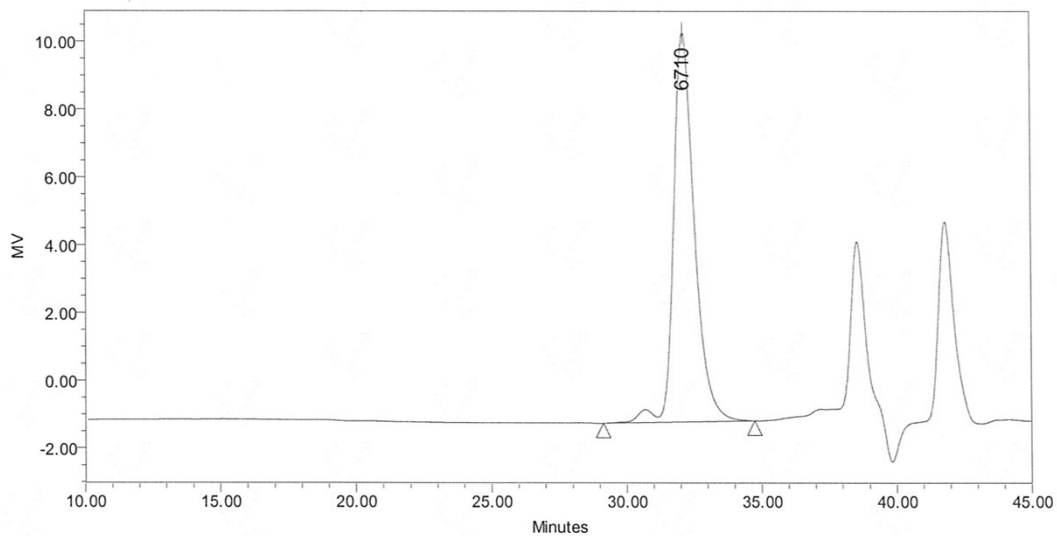

GPC Results

|   | Retention Time | Adjusted RT | Mn   | Mw   | MP   | Mz   | Mz+1 | Polydispersity | Baseline Start | Baseline End |
|---|----------------|-------------|------|------|------|------|------|----------------|----------------|--------------|
| 1 | 32.106         | 32.106      | 6355 | 6646 | 6710 | 7005 | 7522 | 1.045814       | 29.133         | 34.733       |

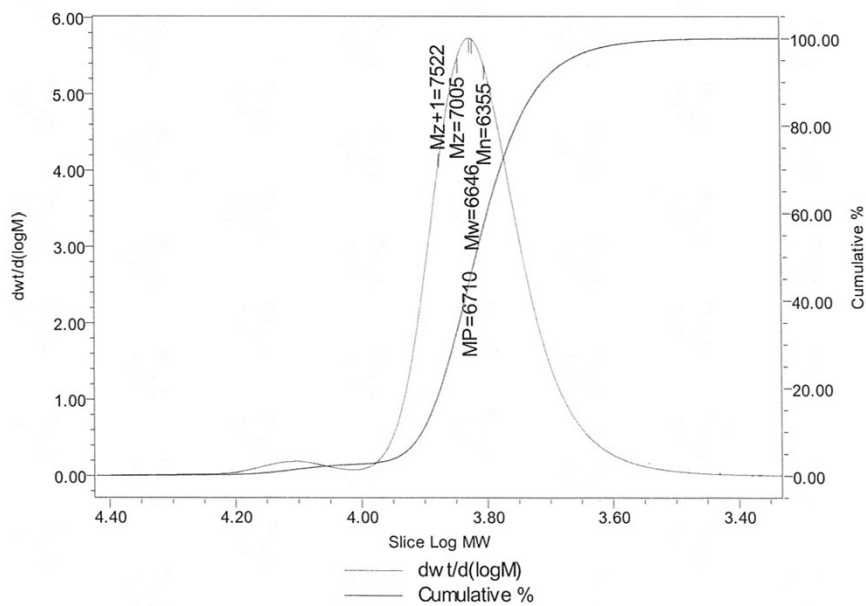

# BAB 14000

Auto-Scaled Chromatogram

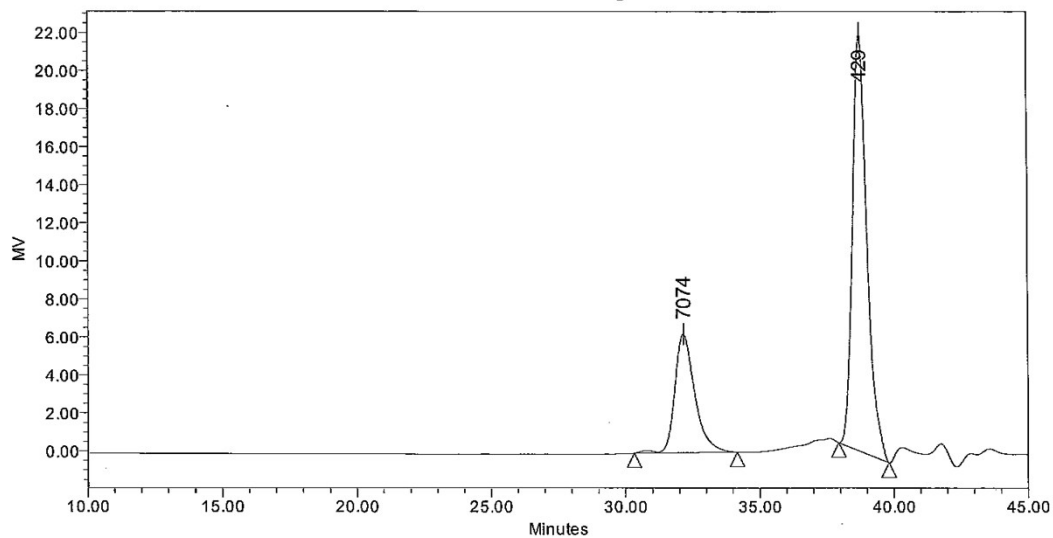

GPC Results

|   | Retention Time | Adjusted RT | Mn   | Mw   | MP   | Mz   | Mz+1 | Polydispersity | Baseline Start | Baseline End |
|---|----------------|-------------|------|------|------|------|------|----------------|----------------|--------------|
| 1 | 32.164         | 32.164      | 6653 | 6894 | 7074 | 7151 | 7452 | 1.036256       | 30.333         | 34.167       |
| 2 | 38.752         | 38.752      |      |      | 429  |      |      |                | 37.950         | 39.817       |

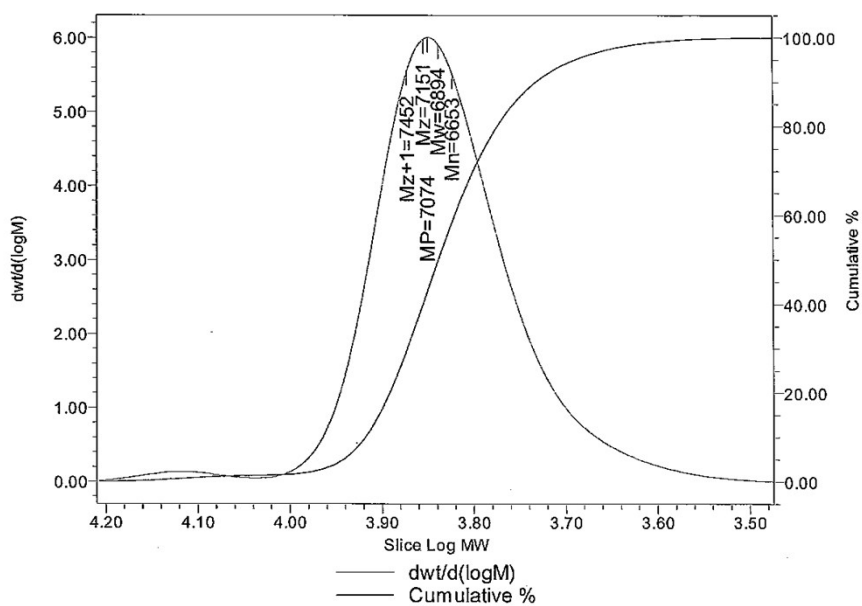

# BAB 17000

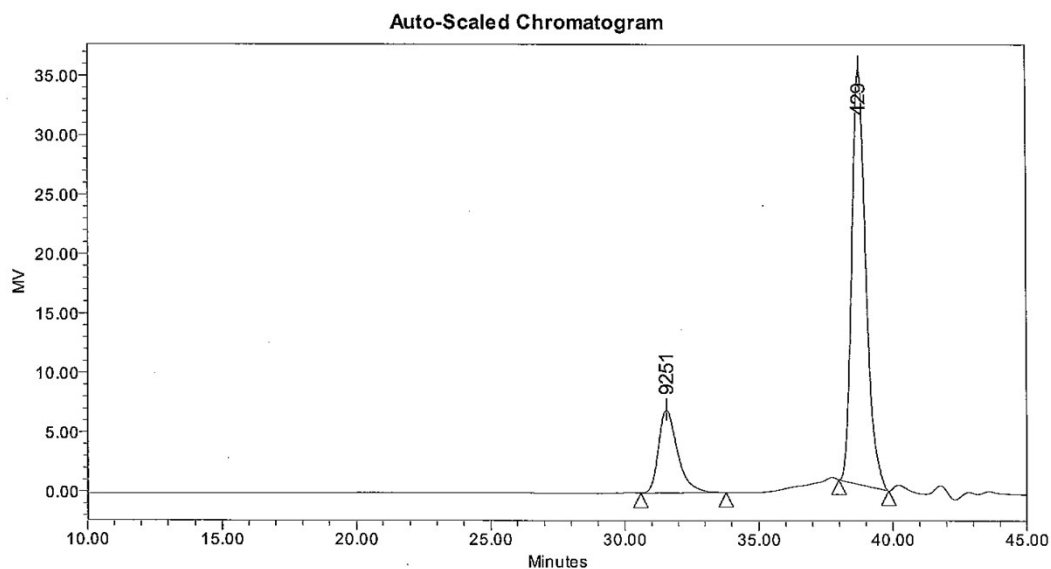

**GPC Results**

|   | Retention Time | Adjusted RT | Mn   | Mw   | MP   | Mz   | Mz+1 | Polydispersity | Baseline Start | Baseline End |
|---|----------------|-------------|------|------|------|------|------|----------------|----------------|--------------|
| 1 | 31.561         | 31.561      | 8629 | 8878 | 9251 | 9102 | 9307 | 1.028817       | 30.600         | 33.783       |
| 2 | 38.752         | 38.752      |      |      | 429  |      |      |                | 37.983         | 39.850       |

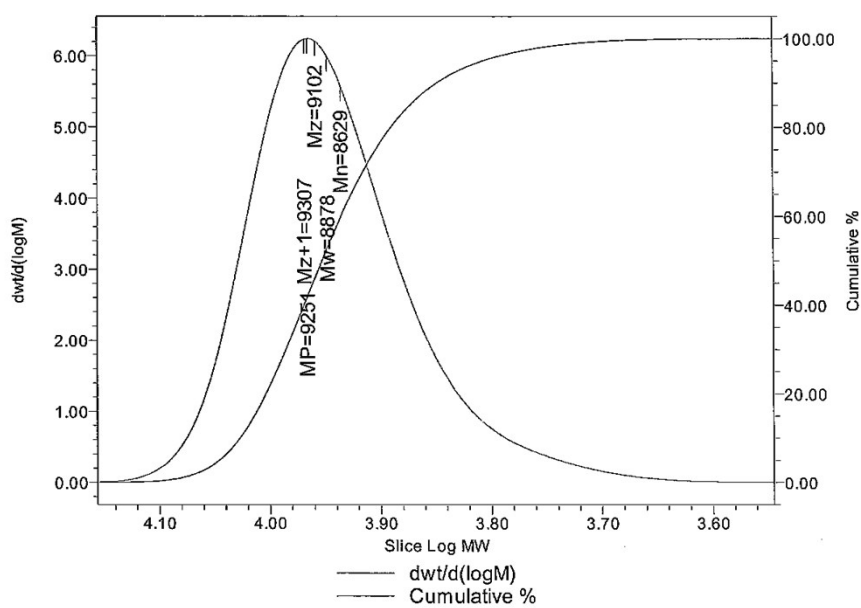

**Figure 3S.** GPC data of the BAB copolymers.

#### 4. DSC

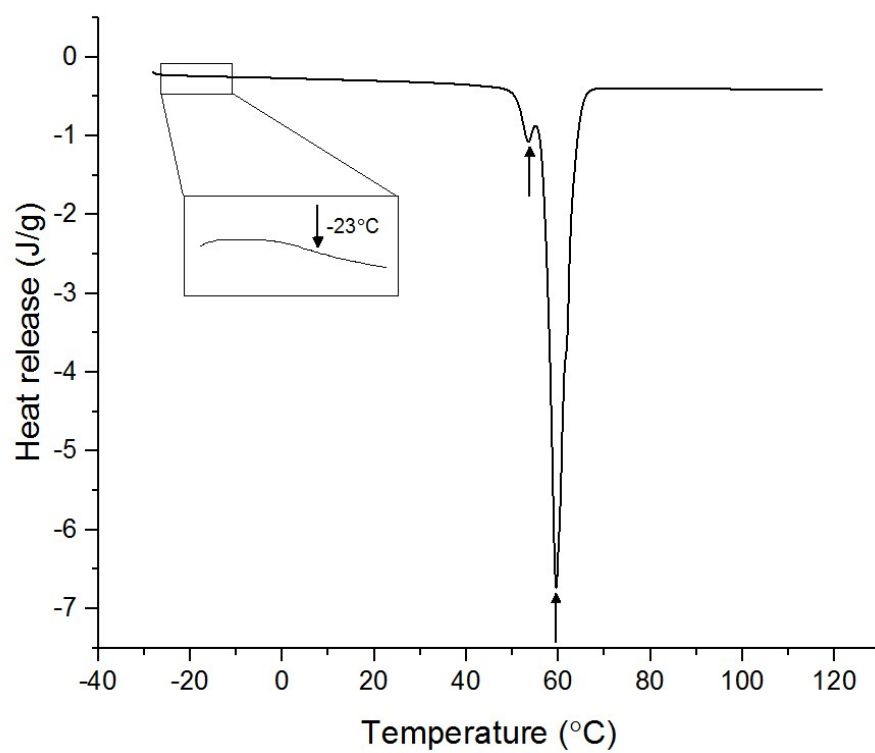

**Figure 4S.** DSC trace of the di-amino PEG starting material.

## 5. CMC and DLS

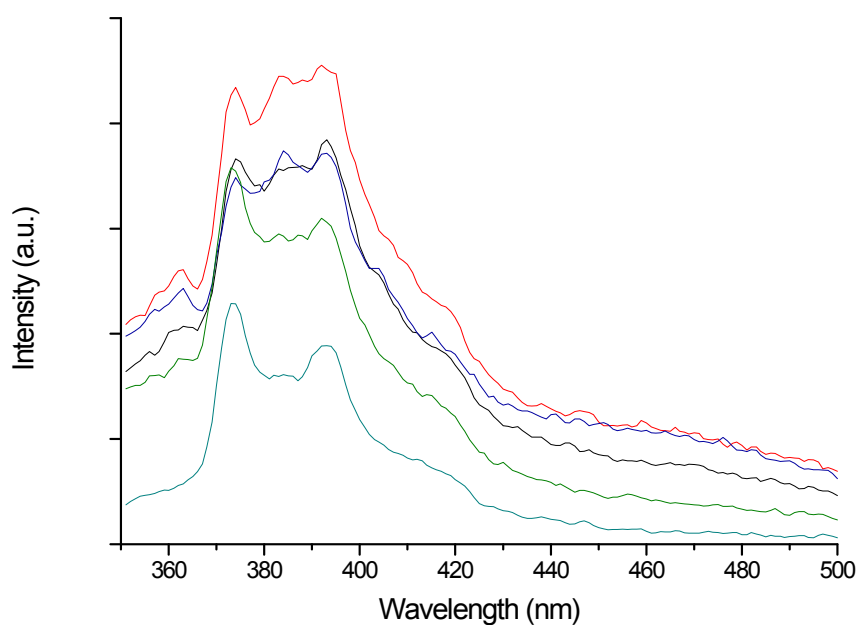

**Figure 5S.** Typical fluorescence spectra of pyrene in aqueous of BAB 12000 at various concentrations varying from  $3.0 \times 10^{-5}$  g/mL to  $1.1 \times 10^{-3}$  g/mL (increasing concentrations from top to bottom). For clarity only 5 representative curves for BAB 12000 are shown; all copolymers display similar curves.

**Table 4S.** Stock solution and minimum dilution concentrations achieved for the four block copolymers investigated.

| BAB copolymer | Stock concentration (g mL <sup>-1</sup> ) | Lowest concentration (g mL <sup>-1</sup> ) |
|---------------|-------------------------------------------|--------------------------------------------|
| BAB 5000      | $2.10 \times 10^{-3}$                     | $4.20 \times 10^{-6}$                      |
| BAB 12000     | $1.60 \times 10^{-3}$                     | $13.2 \times 10^{-6}$                      |
| BAB14000      | $1.00 \times 10^{-3}$                     | $1.00 \times 10^{-7}$                      |
| BAB 17000     | $1.06 \times 10^{-3}$                     | $2.10 \times 10^{-6}$                      |

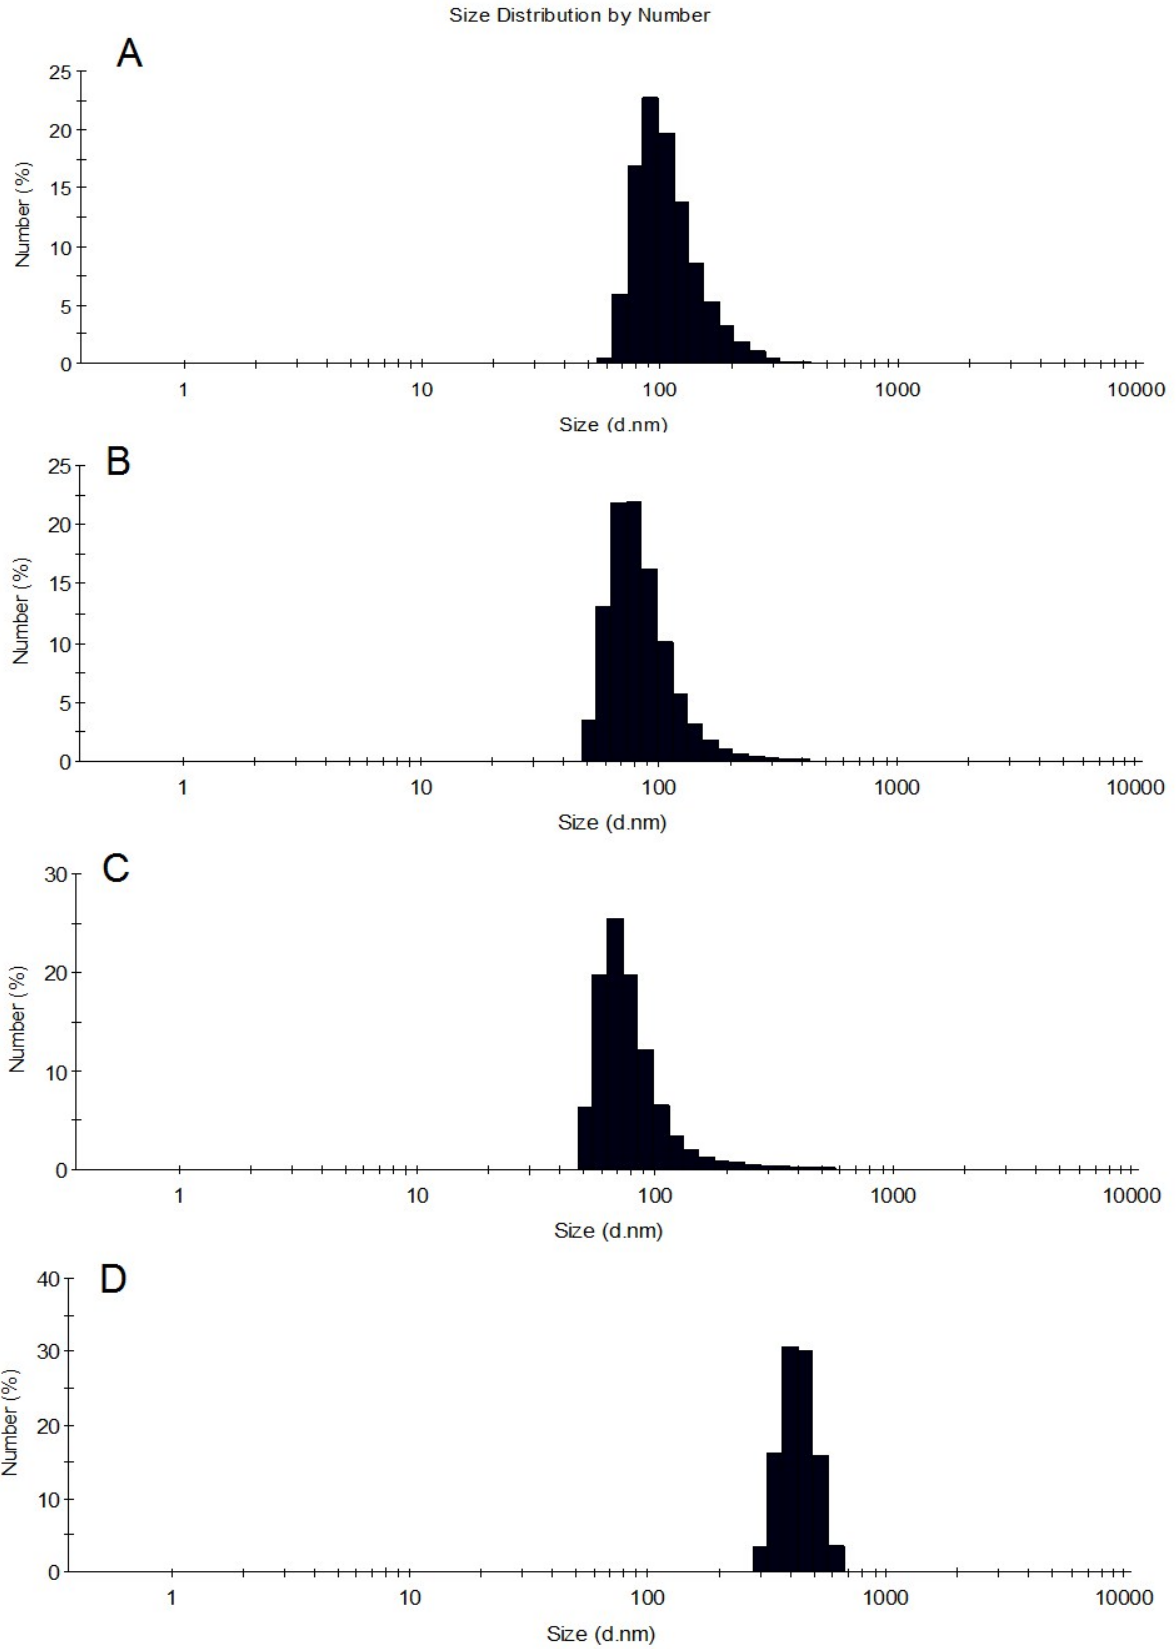

**Figure 6S.** DLS size distribution by number histograms of (A) BAB 5000, (B) BAB 12000, (C) BAB 14000 and (D) BAB 17000 micelles dialysed from acetone.

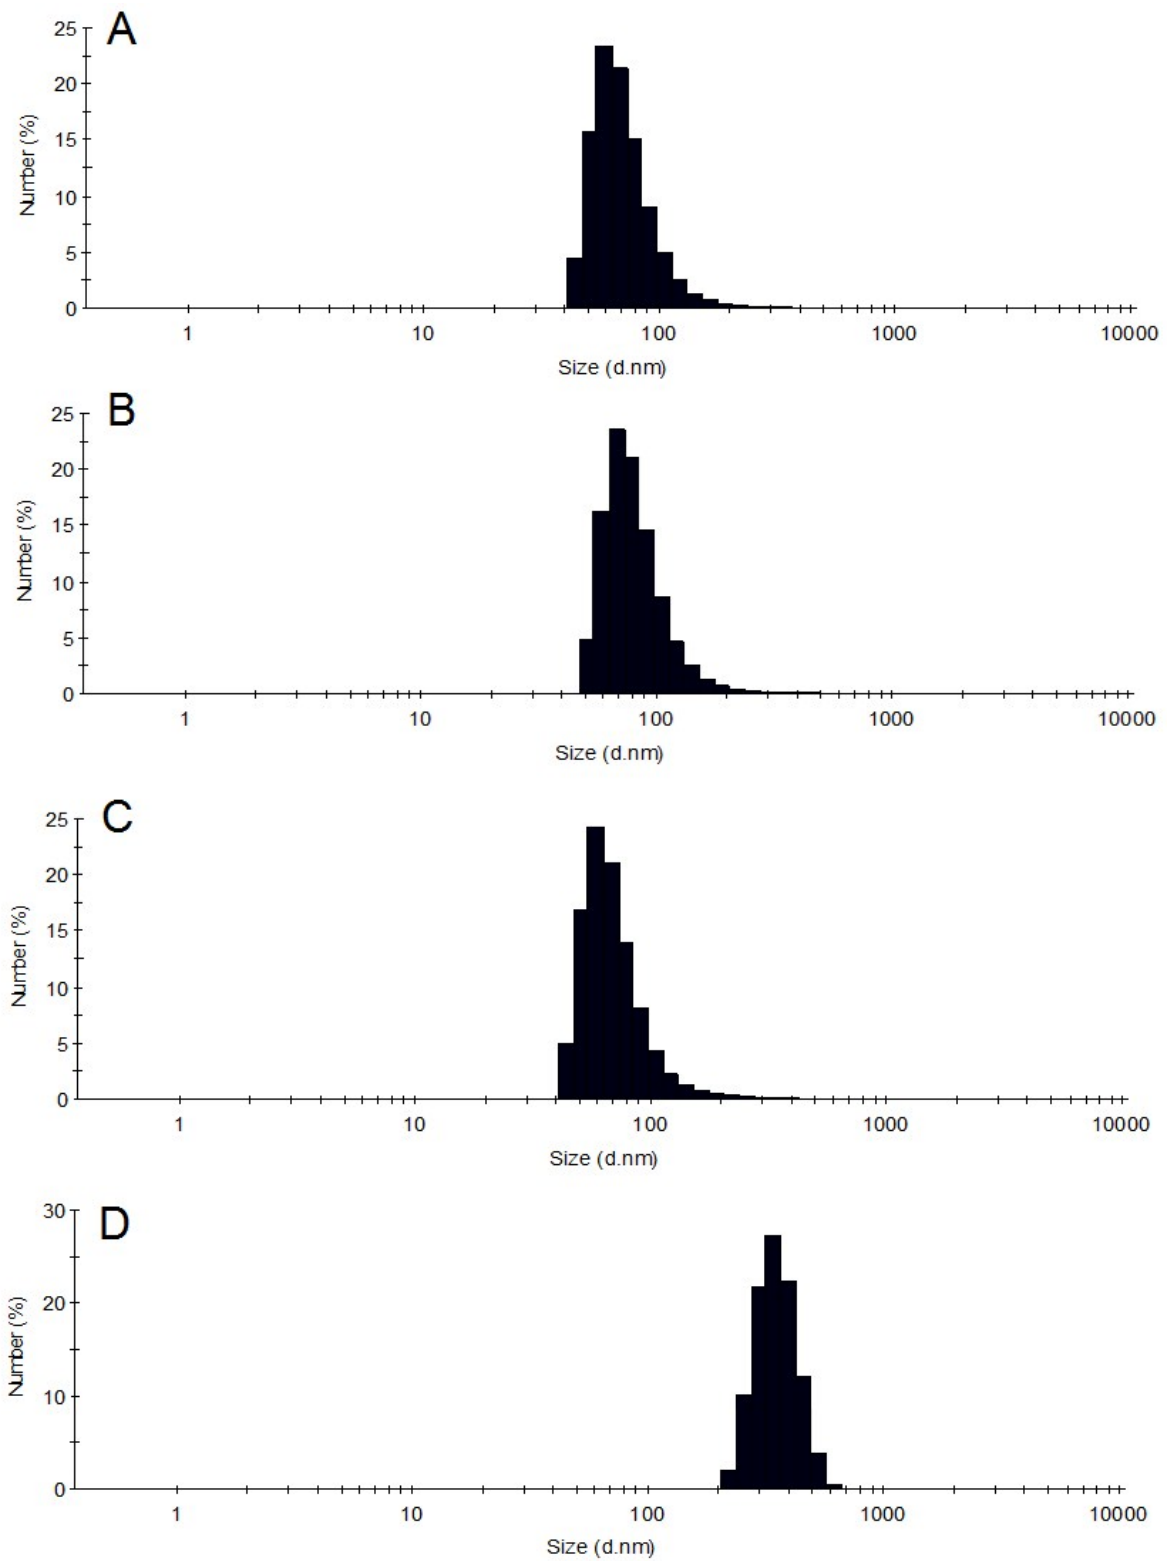

**Figure 7S.** DLS size distribution by number histograms of (A) BAB 5000, (B) BAB 12000, (C) BAB 14000 and (D) BAB 17000 micelles dialysed from DMSO.
